# Supplementary material
Source: publisher site journal article supplement (https://www.dovepress.com/article/607994)
Supplement: Supplementary file 1 [file 607994%20Revised%20Supplementary%20Material.docx]

AAT-App Rehabilitation Trial: The effect of smartphone-delivered cognitive training on relapse and treatment re-admission among patients leaving residential alcohol treatment

Supplementary material

**SUPPLEMENTARY METHODS:**

**Measures**

*Alcohol Use Disorders Identification Test*

The Alcohol Use Disorders Identification Test (AUDIT) was used to measure the severity of alcohol use and related problems. The AUDIT consists of 10 items, each scored 0-4. Hence, total scores range from 0-40, with higher scores indicating more severe AUD. Wording of instructions and questions were modified to ask participants to base their answers on the past 3 months (rather than the past year) so that equivalent, non-overlapping periods were assessed at baseline and 3-month and 6-month follow-ups.

*Severity of Dependence Scale*

The Severity of Dependence Scale (SDS) assessed severity of past-month psychological dependence on alcohol. The SDS comprises 5 items, each scored 0-3, hence total scores range from 0-15, with higher scores indicating more severe dependence. Since the SDS was initially developed to measure dependence on heroin, cocaine, and amphetamines, wording of some items was modified to enhance its relevance to alcohol, similar to the wording used by Gossop et al.1

*Craving Experience Questionnaire – Frequency scale*

The Craving Experience Questionnaire Frequency scale (CEQ-F) was used to measure the frequency of alcohol cravings during the past week. This is a 10-item scale, with each item rated on a scale of 0-10. Total scores are calculated based on the mean of individual items, hence total scores range from 0-10, with higher scores indicating more frequent craving-related thoughts and mental imagery.

*Australian Treatment Outcomes Profile health and quality of life items*

Three separate single item measures were adapted from the Australian Treatment Outcomes Profile (ATOP) to assess past-month psychological health, physical health, and overall quality of life. Each item was rated on a scale from 0 (poor) to 10 (good).

*Depression Anxiety Stress Scale*

The 21-item version of the Depression Anxiety Stress Scales (DASS-21) assessed participants’ past-week symptoms of depression, anxiety, and stress. The DASS-21 comprises 3 separate 7-item scales, with each item scored 0-3. Hence, total scores for each of the 3 scales range from 0-21, with higher scores indicating more severe symptoms.

*Snaith-Hamilton Pleasure Scale*

The Snaith-Hamilton Pleasure Scale (SHAPS) assessed participants’ subjective capacity to experience pleasure in response to non-alcohol-related activities and experiences. The SHAPS comprises 14 items and, following the scoring method validated by Franken et al.,2 each item was scored 0-3, yielding total scores that can range from 0-42, with higher scores indicating worse anhedonia. To ensure that we were measuring hedonic responses to non-alcohol-related experiences, the wording of one item (“I would enjoy a cup of tea or coffee or my favourite drink”) was changed to “I would enjoy a tea or coffee or my favourite *non-alcoholic* drink”.

*Treatment service use*

Participants were asked, during the 6-month follow-up phone interview, whether they had any readmission to substance use withdrawal or rehabilitation treatment, or any alcohol-related emergency department or inpatient hospital admissions, since discharging from the residential treatment episode during which they were recruited. If they reported any of these treatment types, they were asked to report the start date of the treatment episode, to allow calculation of the interval (for use in survival analysis) between discharge from the index rehabilitation episode and first readmission for acute or residential AUD treatment.

**Statistical analyses of secondary outcomes**

Mixed-effects Poisson regression models, including levels for participant and site, were used to test the effects of group and time (baseline, post-intervention, 1-month, 3-month, and 6-month follow-ups, with baseline as the reference timepoint), and their interactions, on past-week drinking days and past-week heavy drinking days (HDDs). Linear mixed-effects models, including levels for participant and site, were used to test effects of group, time, and their interaction, on past-week standard drinks, AUDIT, SDS, ATOP items, DASS-21 scales, and SHAPS. Time had 3 categories for AUDIT (baseline, 3-month, and 6-month follow-up; baseline as reference); 4 for SDS, SHAPS, and for each DASS-21 scale (baseline, post-intervention, 1-month, and 3-month follow-ups; baseline as reference); and 5 for each ATOP item and for past-week standard drinks (baseline, post-intervention, 1-month, 3-month, and 6-month follow-ups; baseline as reference). CEQ-F scores were also analysed with a linear mixed-effects model, but which also controlled for past-week alcohol use as a binary (abstinent vs. non-abstinent), time-varying covariate, since craving scores are typically strongly influenced by recent alcohol use. Since craving scores are typically very low in most participants during residential treatment, and all participants were abstinent at the time of baseline questionnaires, the baseline CEQ-F was excluded from the model (hence only post-intervention, 1-month, 3-month, and 6-month follow-ups were included in this model; post-intervention as reference). The proportion of participants who met criteria for AUD (i.e., reported 2 or more symptoms in the last 6 months) at the 6-month follow-up was analysed using mixed-effects logistic regression testing the effect of group, with recruitment site as a level. A Kaplan-Meier log-rank test was used to compare survival curves for readmission to inpatient alcohol-related treatment.

**SUPPLEMENTARY RESULTS**

*Secondary alcohol consumption outcomes*

Analyses of past-week drinking days (Table S1) and HDDs (Table S2) both showed significant main effects of time, reflecting participants’ lower alcohol use at all post-treatment time points than prior to treatment admission, but showed no significant effects of group or group x time interactions. Past-week standard drinks also showed substantial main effects of time, but no group x time interactions (see Table S3). A significant main effect of group was found for past-week standard drinks (p=.029), but examination of pairwise contrasts suggested this was due to a chance difference between groups at baseline, with differences between groups non-significant at all post-baseline time point (all ps>.352).

Table S1. Results of mixed-effects Poisson regression model of past-week drinking days.

|  | Coefficient | 95% confidence interval | p |
| --- | --- | --- | --- |
| Constant | 1.49 | 1.30, 1.67 | **<.001** |
| Group (control as reference) | -0.01 | -0.28, 0.27 | .960 |
| Time (baseline as reference) |  |  |  |
| post-intervention | -1.62 | -1.89, -1.34 | **<.001** |
| 1-month follow-up | -1.30 | -1.55, -1.05 | **<.001** |
| 3-month follow-up | -1.23 | -1.49, -0.97 | **<.001** |
| 6-month follow-up | -1.17 | -1.42, -0.93 | **<.001** |
| Group x time interaction |  |  |  |
| post-intervention | -0.02 | -0.43, 0.39 | .915 |
| 1-month follow-up | 0.04 | -0.33, 0.42 | .815 |
| 3-month follow-up | -0.13 | -0.52, 0.26 | .516 |
| 6-month follow-up | 0.05 | -0.31, 0.40 | .802 |

Bold font indicates statistically significant p values (p<.05).

Table S2. Results of mixed-effects Poisson regression model of past-week heavy drinking days (defined as days on which 5 or more standard drinks were consumed).

|  | Coefficient | 95% confidence interval | p |
| --- | --- | --- | --- |
| Constant | 1.34 | 1.12, 1.57 | **<.001** |
| Group (control as reference) | -0.06 | -0.39, 0.26 | .696 |
| Time (baseline as reference) |  |  |  |
| post-intervention | -1.86 | -2.18, -1.54 | **<.001** |
| 1-month follow-up | -1.41 | -1.69, -1.14 | **<.001** |
| 3-month follow-up | -1.51 | -1.81, -1.21 | **<.001** |
| 6-month follow-up | -1.27 | -1.54, -1.01 | **<.001** |
| Group x time interaction |  |  |  |
| post-intervention | 0.12 | -0.35, 0.59 | .612 |
| 1-month follow-up | -0.05 | -0.47, 0.37 | .808 |
| 3-month follow-up | -0.23 | -0.70, 0.24 | .345 |
| 6-month follow-up | 0.01 | -0.39, 0.41 | .962 |

Bold font indicates statistically significant p values (p<.05).

Table S3. Results of linear mixed-effects model of past-week standard drinks.

|  | Coefficient | 95% confidence interval | p |
| --- | --- | --- | --- |
| Constant | 112.17 | 100.62, 123.71 | **<.001** |
| Group (control as reference) | -17.47 | -33.19, -1.75 | **.029** |
| Time (baseline as reference) |  |  |  |
| post-intervention | -100.00 | -114.58, -85.41 | **<.001** |
| 1-month follow-up | -91.78 | -106.72, -76.84 | **<.001** |
| 3-month follow-up | -98.83 | -114.30, -83.36 | **<.001** |
| 6-month follow-up | -90.46 | -105.69, -75.23 | **<.001** |
| Group x time interaction |  |  |  |
| post-intervention | 15.41 | -5.95, 36.78 | .157 |
| 1-month follow-up | 8.62 | -13.57, 30.81 | .446 |
| 3-month follow-up | 15.17 | -7.38, 37.72 | .187 |
| 6-month follow-up | 10.94 | -11.35, 33.22 | .336 |

Bold font indicates statistically significant p values (p<.05).

*Presence and severity of AUD*

Main effects of time in analyses of AUDIT (Table S4) and SDS (Table 5) scores suggested substantial reductions in mean severity of AUD at post-treatment time points, compared to baseline, but there were no significant main effects of group or group x time interactions. The estimated marginal proportion of participants meeting criteria for AUD at the 6-month follow-up was 54% in the control group and 57% in the ApBM group (odds ratio = 1.11 [95% CI: 0.49, 2.54], p=.798). If participants lost to 6-month follow-up were assumed to meet criteria for AUD, these proportions were 70% and 69%, respectively (odds ratio = 0.95 [95% CI: 0.46, 1.99], p=.899).

Table S4. Results of linear mixed-effects model of Alcohol Use Disorders Identification Test (AUDIT) scores.

|  | Coefficient | 95% confidence interval | p |
| --- | --- | --- | --- |
| Constant | 31.49 | 29.30, 33.68 | **<.001** |
| Group (control as reference) | -0.35 | -3.59, 2.90 | .835 |
| Time (baseline as reference) |  |  |  |
| 3-month follow-up | -20.59 | -23.48, -17.69 | **<.001** |
| 6-month follow-up | -17.18 | -20.10, -14.26 | **<.001** |
| Group x time interaction |  |  |  |
| 3-month follow-up | 2.41 | -1.75, 6.58 | .256 |
| 6-month follow-up | 2.20 | -2.05, 6.44 | .310 |

Bold font indicates statistically significant p values (p<.05).

Table S5. Results of linear mixed-effects model of Severity of Dependence Scale (SDS) scores.

|  | Coefficient | 95% confidence interval | p |
| --- | --- | --- | --- |
| Constant | 10.75 | 9.86, 11.64 | **<.001** |
| Group (control as reference) | 0.85 | -0.47, 2.17 | .205 |
| Time (baseline as reference) |  |  |  |
| post-intervention | -6.13 | -7.17, -5.08 | **<.001** |
| 1-month follow-up | -6.48 | -7.53, -5.43 | **<.001** |
| 3-month follow-up | -6.03 | -7.11, -4.95 | **<.001** |
| Group x time interaction |  |  |  |
| post-intervention | -1.24 | -2.77, 0.28 | .109 |
| 1-month follow-up | -0.30 | -1.86, 1.26 | .703 |
| 3-month follow-up | -0.14 | -1.69, 1.42 | .862 |

Bold font indicates statistically significant p values (p<.05).

*Alcohol craving*

CEQ-F scores were robustly associated with participants’ past-week abstinence status, with non-abstinent participants reporting more frequent cravings, but these scores did not significantly change over time across the post-treatment time points, or differ between groups (see Table S6).

Table S6. Results of linear mixed-effects model of Craving Experience Questionnaire – Frequency scale (CEQ-F) scores.

|  | Coefficient | 95% confidence interval | p |
| --- | --- | --- | --- |
| Constant | 3.86 | 3.19, 4.53 | **<.001** |
| Past-week abstinence (non-abstinence as reference) | -1.75 | -2.21, -1.30 | **<.001** |
| Group (control as reference) | 0.51 | -0.34, 1.36 | .240 |
| Time (post-intervention as reference) |  |  |  |
| 1-month follow-up | -0.02 | -0.62, 0.59 | .958 |
| 3-month follow-up | 0.25 | -0.37, 0.86 | .431 |
| 6-month follow-up | -0.15 | -0.77, 0.47 | .639 |
| Group x time interaction |  |  |  |
| 1-month follow-up | -0.20 | -1.09, 0.68 | .651 |
| 3-month follow-up | -0.63 | -1.53, 0.26 | .167 |
| 6-month follow-up | -0.50 | -1.39, 0.39 | .273 |

Bold font indicates statistically significant p values (p<.05).

*ATOP items*

ATOP psychological (Table S7) or physical health (Table S8) ratings did not change significantly over time, or differ between groups. ATOP quality of life ratings were significantly higher at all post-treatment time-points than at baseline (during residential treatment), but there were no significant main effects or interactions involving group (see Table S9).

Table S7. Results of linear mixed-effects model of Australian Treatment Outcomes Profile (ATOP) psychological health ratings

|  | Coefficient | 95% confidence interval | p |
| --- | --- | --- | --- |
| Constant | 5.23 | 4.59, 5.86 | **<.001** |
| Group (control as reference) | -0.37 | -1.14, 0.42 | .359 |
| Time (baseline as reference) |  |  |  |
| post-intervention | 0.42 | -0.23, 1.07 | .203 |
| 1-month follow-up | 0.38 | -0.27, 1.03 | .255 |
| 3-month follow-up | 0.46 | -0.21, 1.13 | .176 |
| 6-month follow-up | 0.15 | -0.53, 0.82 | .668 |
| Group x time interaction |  |  |  |
| post-intervention | 0.70 | -0.25, 1.64 | .150 |
| 1-month follow-up | 0.30 | -0.67, 1.27 | .548 |
| 3-month follow-up | 0.88 | -0.08, 1.85 | .074 |
| 6-month follow-up | 0.67 | -0.31, 1.65 | .179 |

Bold font indicates statistically significant p values (p<.05).

Table S8. Results of linear mixed-effects model of Australian Treatment Outcomes Profile (ATOP) physical health ratings

|  | Coefficient | 95% confidence interval | p |
| --- | --- | --- | --- |
| Constant | 5.62 | 5.10, 6.14 | **<.001** |
| Group (control as reference) | -0.37 | -1.14, 0.40 | .346 |
| Time (baseline as reference) |  |  |  |
| post-intervention | 0.52 | -0.13, 1.16 | .115 |
| 1-month follow-up | 0.50 | -0.15, 1.14 | .135 |
| 3-month follow-up | -0.18 | -0.85, 0.49 | .600 |
| 6-month follow-up | 0.56 | -0.11, 1.23 | .102 |
| Group x time interaction |  |  |  |
| post-intervention | 0.22 | -0.72, 1.17 | .646 |
| 1-month follow-up | 0.34 | -0.62, 1.31 | .486 |
| 3-month follow-up | 0.54 | -0.43, 1.50 | .274 |
| 6-month follow-up | 0.47 | -0.50, 1.45 | .343 |

Bold font indicates statistically significant p values (p<.05).

Table S9. Results of linear mixed-effects model of Australian Treatment Outcomes Profile (ATOP) quality of life ratings

|  | Coefficient | 95% confidence interval | p |
| --- | --- | --- | --- |
| Constant | 5.33 | 4.78, 5.87 | **<.001** |
| Group (control as reference) | -0.35 | -1.15, 0.46 | .401 |
| Time (baseline as reference) |  |  |  |
| post-intervention | 0.81 | 0.17, 1.44 | **.013** |
| 1-month follow-up | 1.09 | 0.45, 1.73 | **.001** |
| 3-month follow-up | 0.78 | 0.12, 1.44 | **.020** |
| 6-month follow-up | 1.33 | 0.66, 1.99 | **<.001** |
| Group x time interaction |  |  |  |
| post-intervention | 0.45 | -0.48, 1.38 | .343 |
| 1-month follow-up | -0.23 | -1.18, 0.72 | .635 |
| 3-month follow-up | 0.61 | -0.34, 1.56 | .206 |
| 6-month follow-up | 0.13 | -0.83, 1.10 | .787 |

Bold font indicates statistically significant p values (p<.05).

*Depression, anxiety, and stress*

DASS-21 depression (Table S10) and anxiety (Table S11) scores did not change significantly over time, or differ between groups. Analysis of DASS-21 stress scores (Table S12) detected a main effect of group due to a chance baseline difference (where ApBM participants had higher stress scores at baseline than controls), however pairwise tests between groups’ estimated marginal means found no significant differences post-intervention (p=.213) or at 1-month (p=.360) or 3-month (p=.494) follow-ups. Moreover, while there were main effects of time, due to higher stress scores at post-treatment timepoints than at baseline, there were no significant group x time interactions.

Table S10. Results of linear mixed-effects model of Depression, Anxiety, and Stress Scale (DASS-21) depression scores.

|  | Coefficient | 95% confidence interval | p |
| --- | --- | --- | --- |
| Constant | 5.62 | 4.46, 6.77 | **<.001** |
| Group (control as reference) | 0.89 | -0.82, 2.61 | .308 |
| Time (baseline as reference) |  |  |  |
| post-intervention | 0.93 | -0.20, 2.06 | .106 |
| 1-month follow-up | 1.11 | -0.03, 2.24 | .057 |
| 3-month follow-up | 0.88 | -0.29, 2.05 | .140 |
| Group x time interaction |  |  |  |
| post-intervention | -0.44 | -2.09, 1.21 | .600 |
| 1-month follow-up | -0.56 | -2.25, 1.13 | .515 |
| 3-month follow-up | -0.64 | -2.32, 1.05 | .458 |

Bold font indicates statistically significant p values (p<.05).

Table S11. Results of linear mixed-effects model of Depression, Anxiety, and Stress Scale (DASS-21) anxiety scores.

|  | Coefficient | 95% confidence interval | p |
| --- | --- | --- | --- |
| Constant | 3.86 | 2.96, 4.77 | **<.001** |
| Group (control as reference) | 1.19 | -0.16, 2.53 | .084 |
| Time (baseline as reference) |  |  |  |
| post-intervention | 0.47 | -0.42, 1.37 | .301 |
| 1-month follow-up | 0.53 | -0.37, 1.44 | .247 |
| 3-month follow-up | 0.48 | -0.45, 1.41 | .309 |
| Group x time interaction |  |  |  |
| post-intervention | -0.94 | -2.25, 0.36 | .157 |
| 1-month follow-up | -0.77 | -2.11, 0.57 | .262 |
| 3-month follow-up | -0.91 | -2.25, 0.43 | .182 |

Bold font indicates statistically significant p values (p<.05).

Table S12. Results of linear mixed-effects model of Depression, Anxiety, and Stress Scale (DASS-21) stress scores.

|  | Coefficient | 95% confidence interval | p |
| --- | --- | --- | --- |
| Constant | 5.71 | 4.72, 6.70 | **<.001** |
| Group (control as reference) | 1.65 | 0.18, 3.11 | **.027** |
| Time (baseline as reference) |  |  |  |
| post-intervention | 1.19 | 0.26, 2.12 | **.012** |
| 1-month follow-up | 1.17 | 0.24, 2.11 | **.014** |
| 3-month follow-up | 1.10 | 0.14, 2.06 | **.025** |
| Group x time interaction |  |  |  |
| post-intervention | -0.65 | -2.00, 0.71 | .351 |
| 1-month follow-up | -0.90 | -2.29, 0.49 | .206 |
| 3-month follow-up | -1.09 | -2.47, 0.30 | .124 |

Bold font indicates statistically significant p values (p<.05).

*Anhedonia*

SHAPS scores showed significant main effects of time, being higher (suggesting more anhedonia/reduced pleasure experience) at all post-treatment timepoints than at baseline, but there were no significant main effects or interactions involving group (see Table S13).

Table S13. Results of linear mixed-effects model of Snaith-Hamilton Pleasure Scale (SHAPS) scores.

|  | Coefficient | 95% confidence interval | p |
| --- | --- | --- | --- |
| Constant | 10.03 | 8.12, 11.95 | **<.001** |
| Group (control as reference) | 1.44 | -1.07, 3.96 | .260 |
| Time (baseline as reference) |  |  |  |
| post-intervention | 3.09 | 1.30, 4.89 | **.001** |
| 1-month follow-up | 3.72 | 1.91, 5.53 | **<.001** |
| 3-month follow-up | 3.19 | 1.33, 5.05 | **.001** |
| Group x time interaction |  |  |  |
| post-intervention | -0.91 | -3.53, 1.71 | .497 |
| 1-month follow-up | -0.59 | -3.28, 2.10 | .668 |
| 3-month follow-up | -1.33 | -4.01, 1.35 | .331 |

Bold font indicates statistically significant p values (p<.05).

*Readmission to acute alcohol-related treatment*

Of the 92 participants who completed the 6-month follow-up, 30 participants (13 controls; 17 ApBM) reported a subsequent substance use withdrawal or rehabilitation episode, or an emergency department or hospital inpatient admission related to alcohol use. Survival analysis did not find a significant difference between groups in rate of onset of these treatments (c2(1)=1.56, p=.212).

Table S14. Responses to app ratings.

| Item | ApBM (*n*=48) | Control (*n*=54) |
| --- | --- | --- |
| The app helped me reduce my alcohol use |  |  |
| strongly disagree | 0 | 3 (6) |
| disagree | 7 (15) | 10 (19) |
| unsure | 32 (67) | 28 (52) |
| agree | 6 (12) | 11 (20) |
| strongly agree | 3 (6) | 2 (4) |
| The app increased my alcohol consumption |  |  |
| strongly disagree | 30 (62) | 36 (67) |
| disagree | 12 (25) | 14 (26) |
| unsure | 6 (12) | 4 (7) |
| agree | 0 | 0 |
| strongly agree | 0 | 0 |
| The app helped reduce my cravings for alcohol |  |  |
| strongly disagree | 1 (2) | 6 (11) |
| disagree | 14 (29) | 10 (19) |
| unsure | 24 (50) | 23 (43) |
| agree | 7 (15) | 13 (24) |
| strongly agree | 2 (4) | 2 (4) |
| The app increased my cravings for alcohol |  |  |
| strongly disagree | 17 (35) | 28 (52) |
| disagree | 18 (38) | 15 (28) |
| unsure | 9 (19) | 11 (20) |
| agree | 4 (8) | 0 |
| strongly agree | 0 | 0 |
| The app helped increase my interest in healthy activities and positive goals |  |  |
| strongly disagree | 1 (2) | 6 (11) |
| disagree | 16 (33) | 13 (24) |
| unsure | 17 (35) | 19 (35) |
| agree | 11 (23) | 14 (26) |
| strongly agree | 3 (6) | 2 (4) |
| The app helped increase my engagement in healthy activities and pursuing positive goals |  |  |
| strongly disagree | 1 (2) | 7 (13) |
| disagree | 15 (31) | 12 (22) |
| unsure | 18 (38) | 22 (41) |
| agree | 13 (27) | 11 (20) |
| strongly agree | 1 (2) | 2 (4) |

All data are presented as n (%). ApBM: Approach bias modification

Table S15. Results of mixed-effects logistic regression analysis of past-month abstinence at follow-ups, with analysis restricted to participants who installed the app within 7 days of discharge from residential treatment

|  | Observed data (N=99) | | | Imputed model (N=119) | | |
| --- | --- | --- | --- | --- | --- | --- |
| Effect | Odds ratio | 95% CI | p | Odds ratio | 95% CI | p |
| Constant | 3.11 | 0.78, 12.40 | .108 | 0.48 | 0.16, 1.43 | .188 |
| Group (control as reference) | 0.68 | 0.09, 4.83 | .697 | 0.99 | 0.21, 4.72 | .994 |
| Time (1-month follow-up as reference) |  |  |  |  |  |  |
| 3-month follow-up | 0.59 | 0.15, 2.32 | .453 | 0.64 | 0.22, 1.87 | .419 |
| 6-month follow-up | 0.25 | 0.06, 1.08 | .063 | 0.30 | 0.10, 0.91 | **.035** |
| Group x time interaction |  |  |  |  |  |  |
| 3-month follow-up | 0.58 | 0.08, 4.21 | .594 | 0.79 | 0.16, 3.78 | .766 |
| 6-month follow-up | 1.19 | 0.16, 9.07 | .865 | 1.43 | 0.29, 7.15 | .662 |

Bold font indicates statistically significant p values (p<.05).

CI: confidence interval

**References**

1. Gossop M, Marsden J, Stewart D. Dual dependence: Assessment of dependence upon alcohol and illicit drugs, and the relationship of alcohol dependence among drug misusers to patterns of drinking, illicit drug use and health problems. Addiction. 2002;97(2):169-78.

2. Franken IHA, Rassin E, Muris P. The assessment of anhedonia in clinical and non-clinical populations: Further validation of the Snaith–Hamilton Pleasure Scale (SHAPS). Journal of Affective Disorders. 2007;99(1):83-9.
